# Supplementary material
Source: publisher figshare collection journal article supplement (https://frontiersin.figshare.com/ndownloader/files/13663424)
Supplement: Supplementary file [file 13663424]

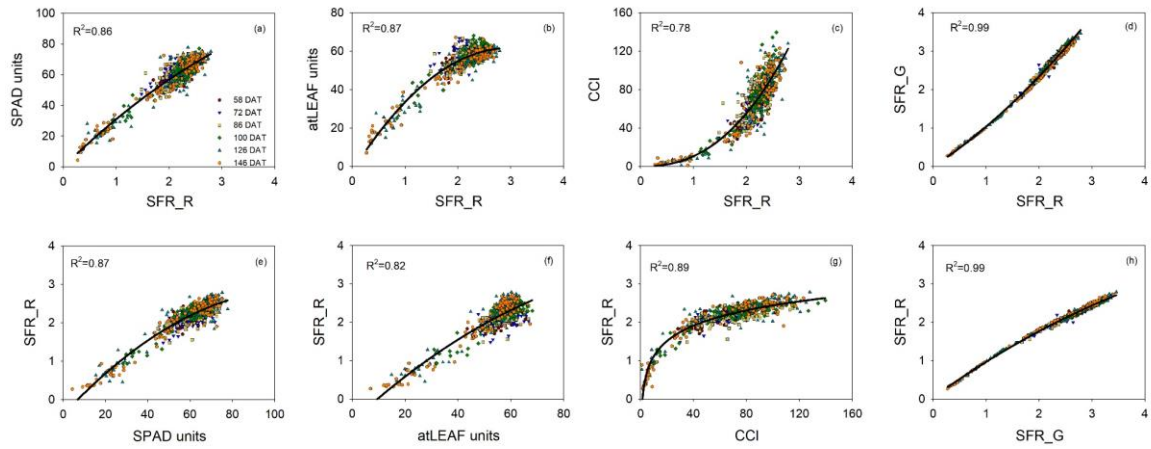

Figure S6. Relationship between measurements of different chlorophyll meters with the Simple Fluorescence Ratio under red excitation (SFR\_R), measured with the Multiplex sensor. Coefficient of determination ( $R^2$ ) of the regression is shown; equations and standard errors of the estimate ( $\pm$ SEE) are in Supplementary Table S2. CCI is chlorophyll content index, measured with the MC-100 meter.
